# Supplementary material for: Identification and Analysis of Amygdalin, Neoamygdalin and Amygdalin Amide in Different Processed Bitter Almonds by HPLC-ESI-MS/MS and HPLC-DAD
Source: PubMed Central journal article supplement (PMC6151405; doi:10.3390/molecules22091425), 2017-08-30
Supplement: molecules-22-01425-s001.pdf [file molecules-22-01425-s001.pdf]

shansheng-2 #807 RT: 5.50 AV: 1 NL: 5.97E6  
T: FTMS - c ESI Full ms [100.00-1200.00]

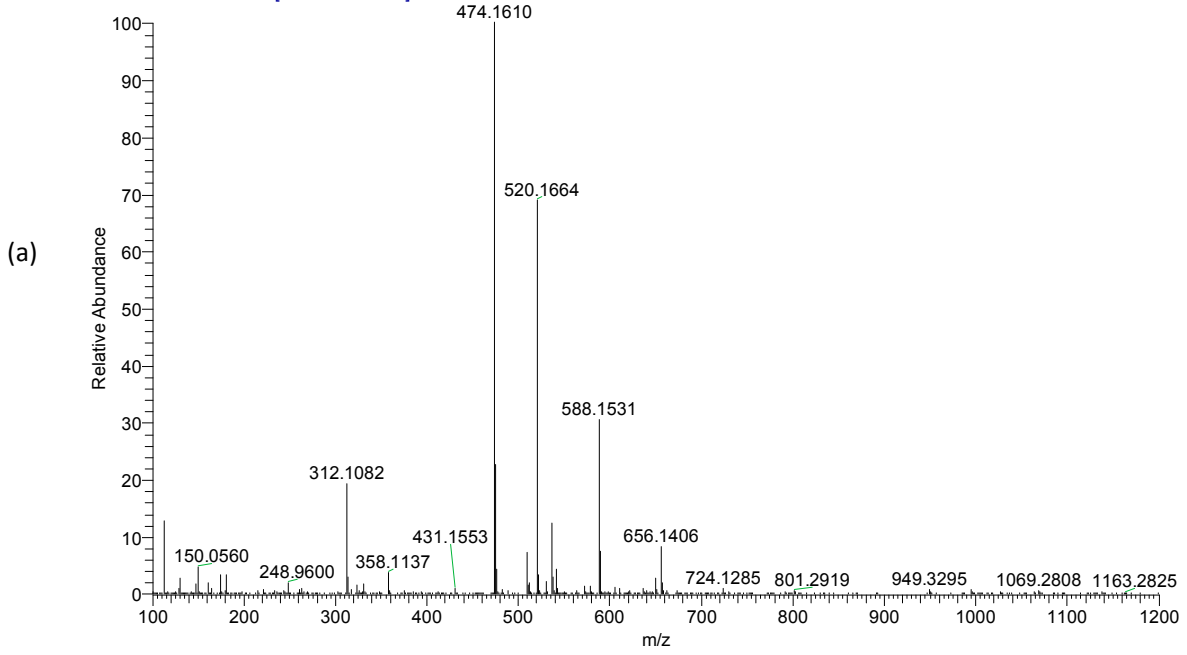

shansheng-2 #718-886 RT: 4.90-6.04 AV: 14 NL: 1.01E3  
T: Average spectrum MS2 474.16 (718-886)

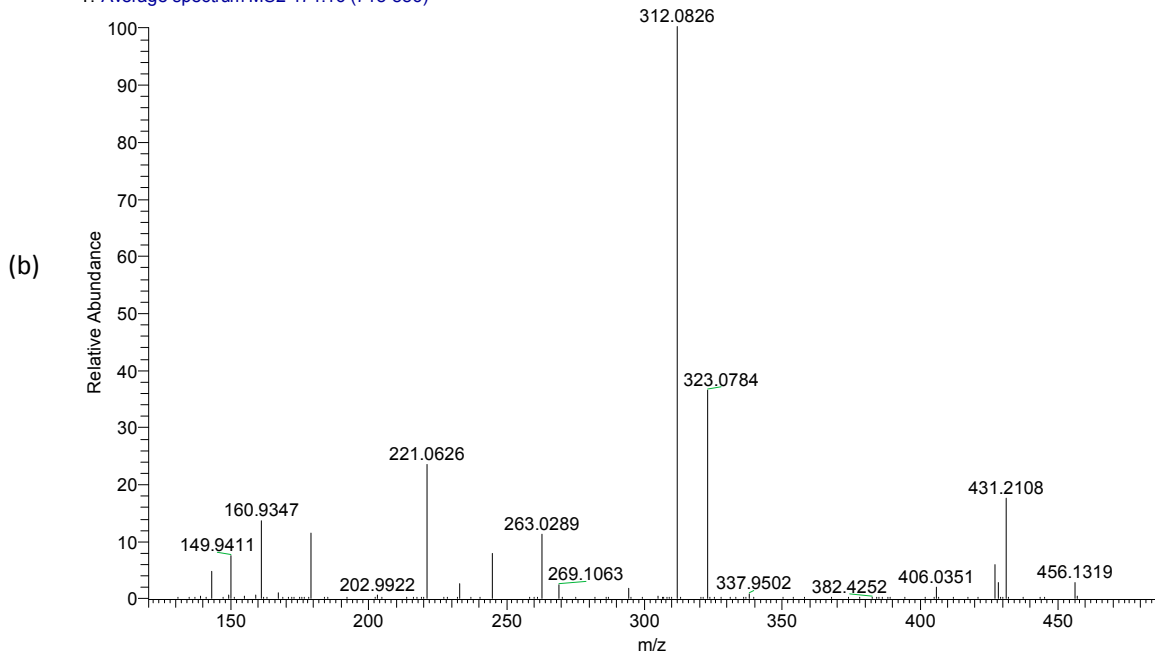

Figure 1. Negative mode product ion spectrum of amygdalin amide. a. Spectrum of MS, b. Spectrum of MS<sup>2</sup>

shansheng-2 #1660 RT: 11.41 AV: 1 NL: 3.43E7  
T: FTMS - c ESI Full ms [100.00-1200.00]

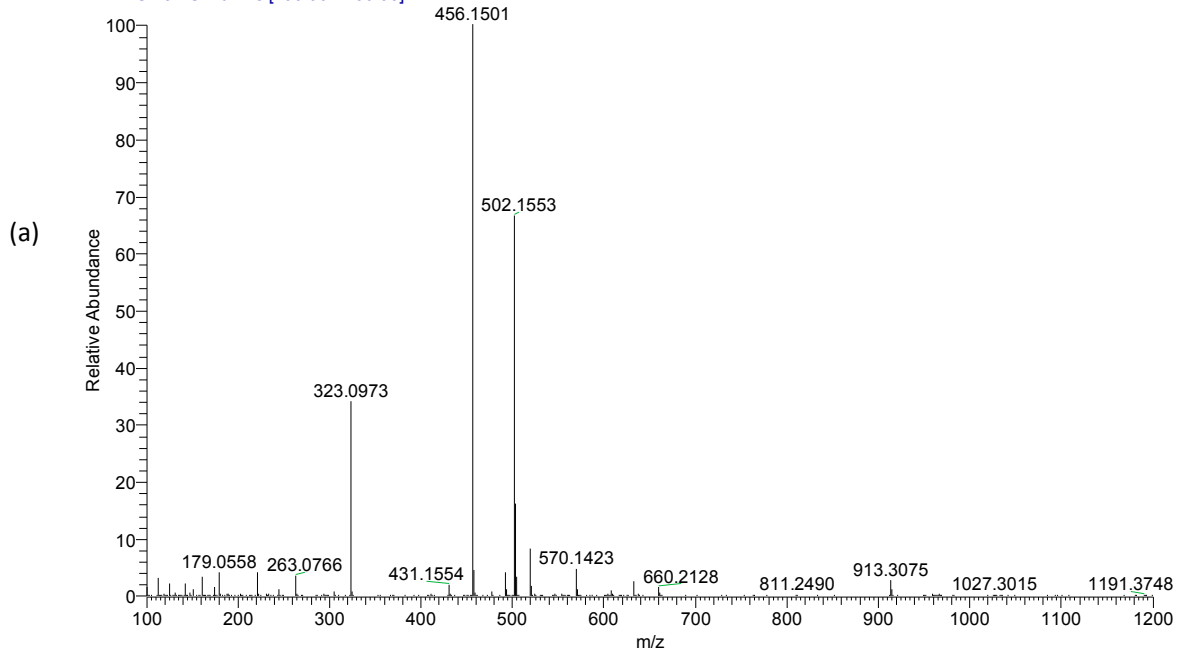

shansheng-2 #1633 RT: 11.29 AV: 1 NL: 6.07E5  
F: FTMS - c ESI d Full ms2 456.15@cid35.00 [115.00-470.00]

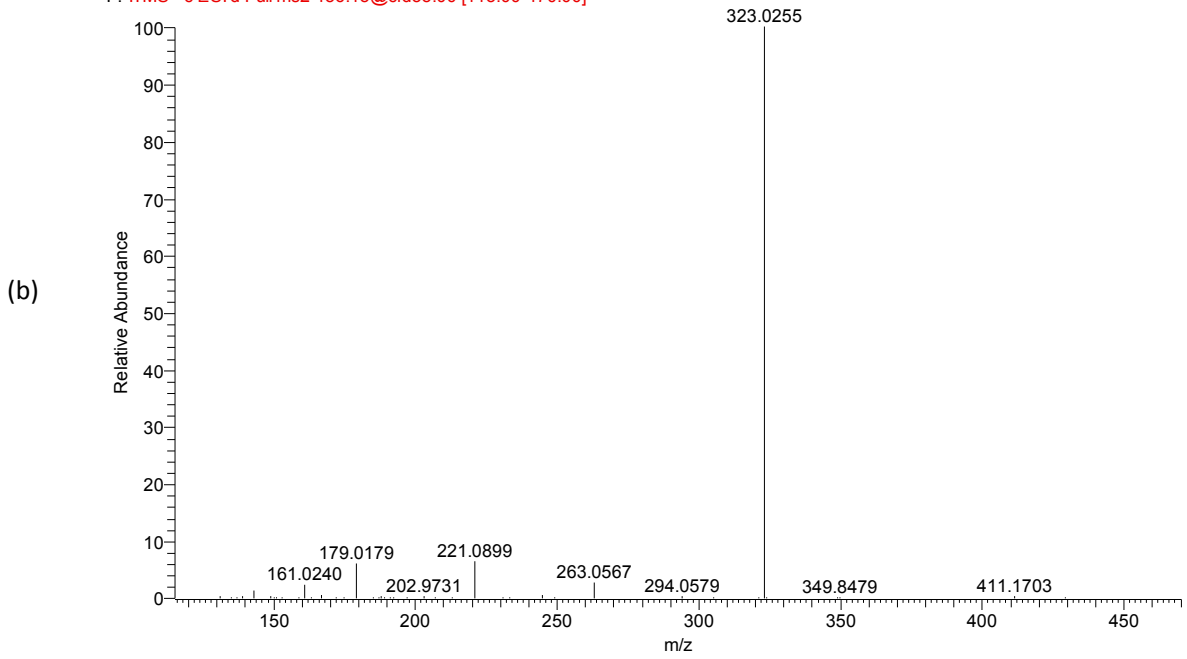

shansheng-2 #1630 RT: 11.28 AV: 1 NL: 2.23E4  
F: ITMS - c ESI d Full ms3 456.15@cid35.00 323.03@cid35.00 [75.00-335.00]

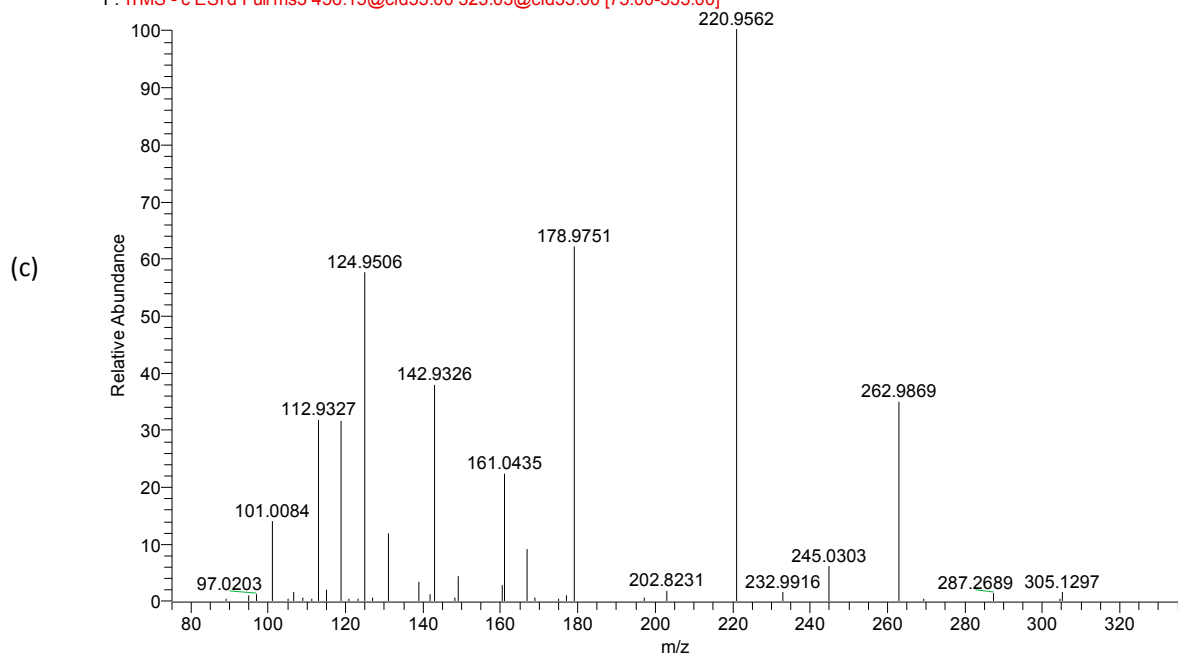

Figure 2. Negative mode product ion spectrum of amygdalin. a. Spectrum of MS, b. Spectrum of MS<sup>2</sup>, c. Spectrum of MS<sup>3</sup>

kuxingren01\_140630161551 #2213 RT: 16.06 AV: 1 NL: 3.09E6  
T: FTMS - c ESI Full ms [100.00-1200.00]

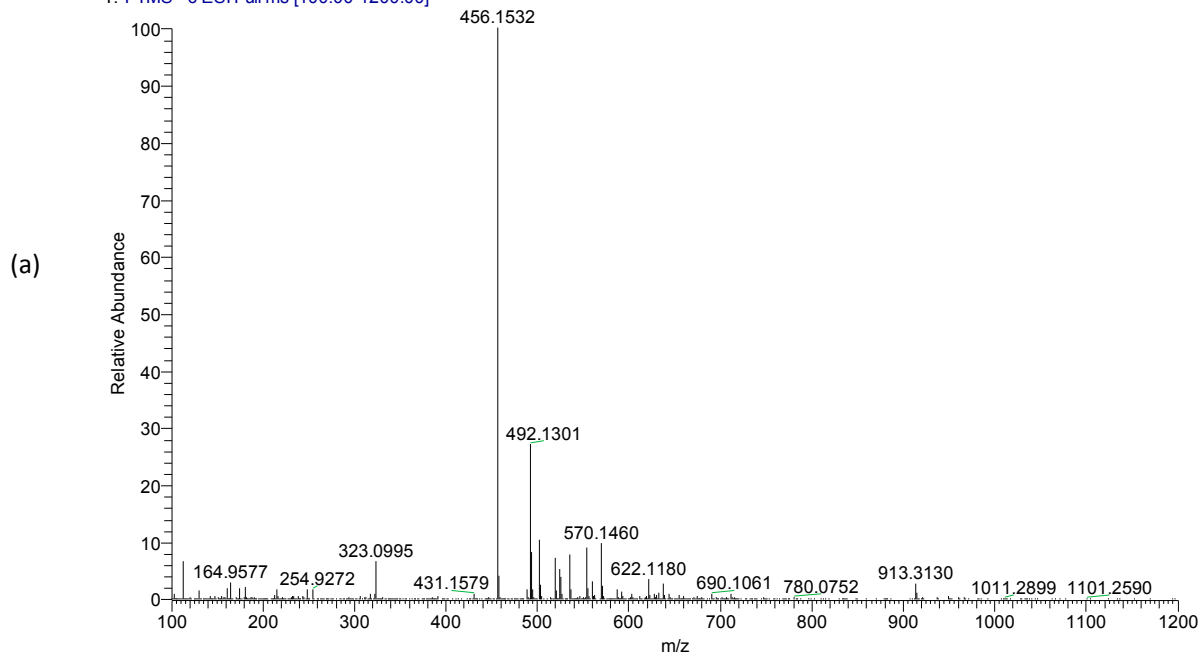

kuxingren01\_140630161551 #2208 RT: 16.03 AV: 1 NL: 6.37E4  
F: ITMS - c ESI d Full ms2 456.15@cid35.00 [115.00-470.00]

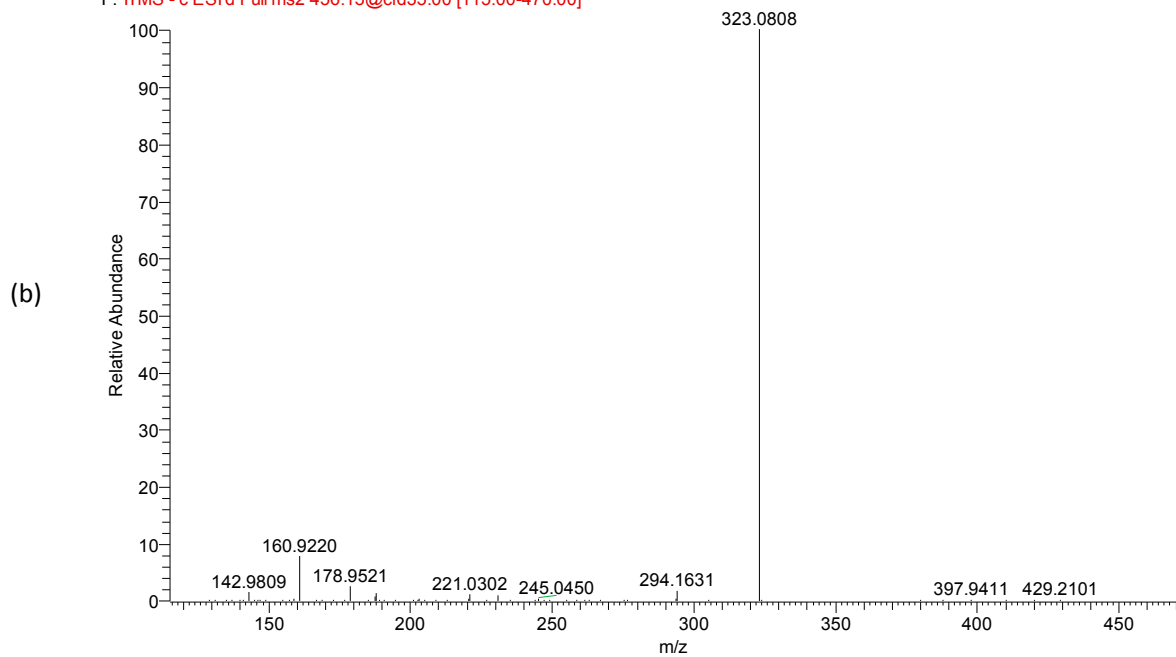

kuxingren01\_140630161551 #2230 RT: 16.15 AV: 1 NL: 7.40E3  
F: ITMS - c ESI d Full ms3 456.15@cid35.00 323.10@cid35.00 [75.00-660.00]

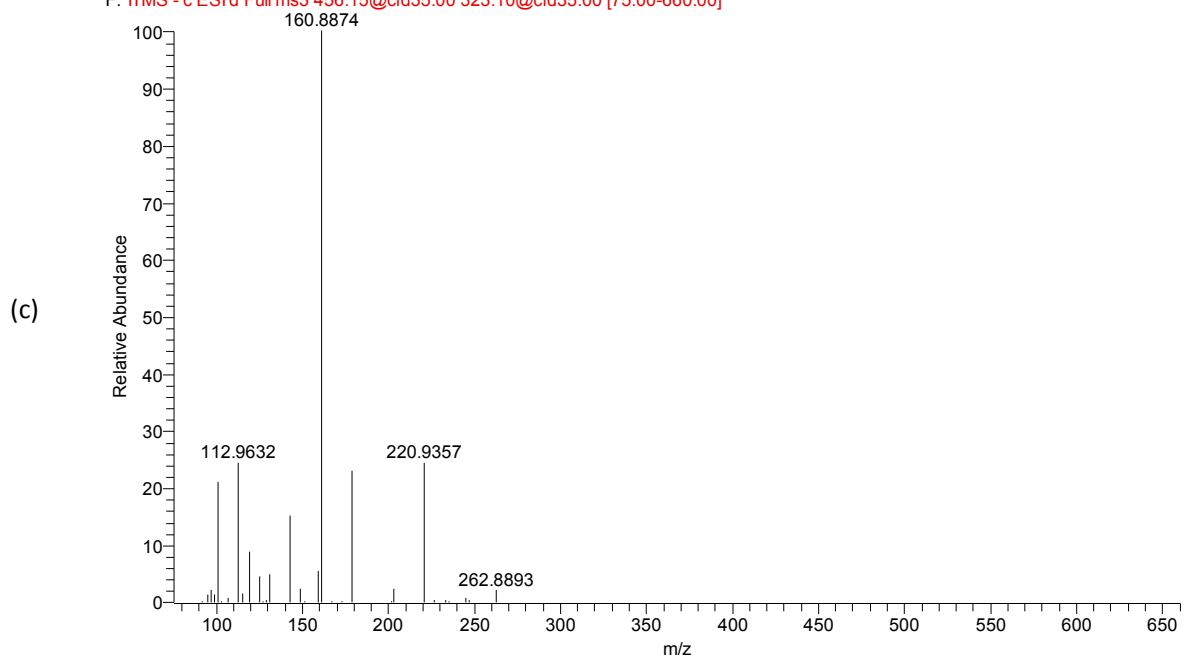

Figure 3. Negative mode product ion spectrum of neoamygdalin. a. Spectrum of MS, b. Spectrum of MS<sup>2</sup>, c. Spectrum of MS<sup>3</sup>

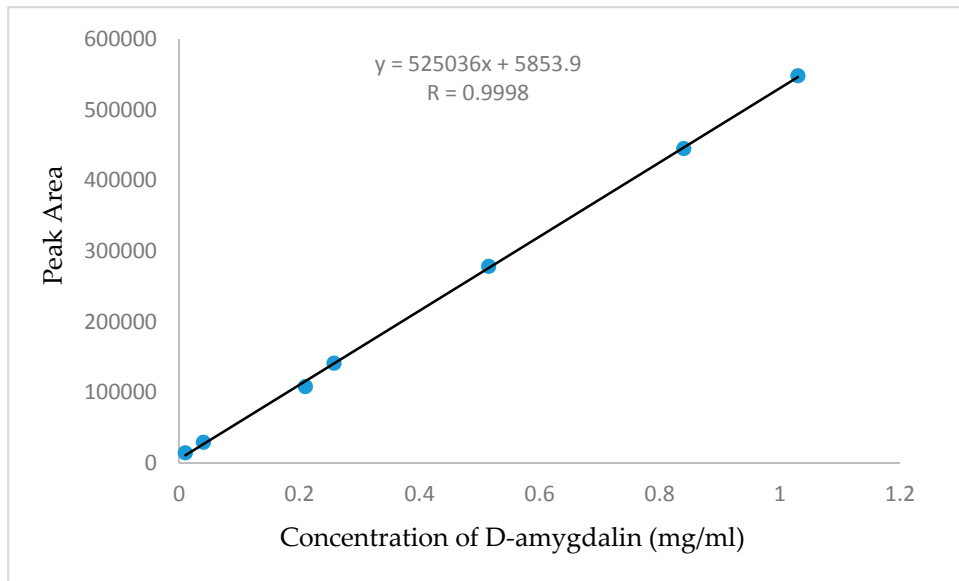

Figure 4. Calibration curves of D-amygdalin
